# Supplementary material for: Visualization of Murine Vascular Remodeling and Blood Flow Dynamics by Ultra-High-Frequency Ultrasound Imaging
Source: MDPI journal article supplement (doi:10.3390/ijms232113298), 2022-10-31
Supplement: s1 [file s1]

## **Index Supplemental Appendix**

| <b>Title</b>            | <b>Page number</b> |
|-------------------------|--------------------|
| Supplementary Figure S1 | 2                  |
| Supplementary Figure S2 | 3, 4               |
| Supplementary Figure S3 | 5                  |
| Supplementary Figure S4 | 6                  |
| Supplementary Figure S5 | 7                  |
| Supplementary Figure S6 | 8                  |
| Supplementary Figure S7 | 9                  |

## A Wall-to-lumen ratio

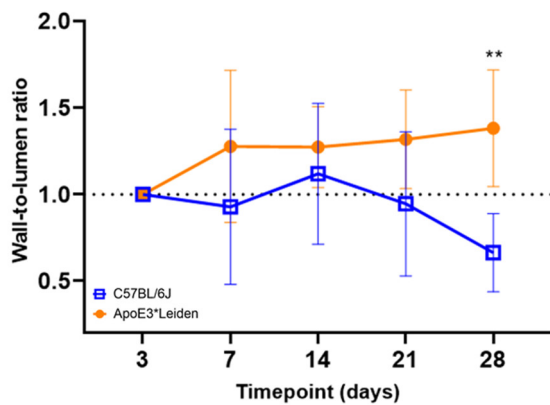

**Supplementary Figure S1 | Wall-to-lumen ratio of vein grafts in C57BL/6J and ApoE3\*Leiden mice over time.**

(A) Wall-to-lumen ratio of C57BL/6J (n=7) and ApoE3\*Leiden (n=7) mice over the course of 28 days post-surgery. The data are shown relative to baseline t=3 days after surgery, with lumen and wall size being 100% (ratio=1.0). Statistics: ANOVA mixed model, corrected for multiple testing; \*\* p<0.01.

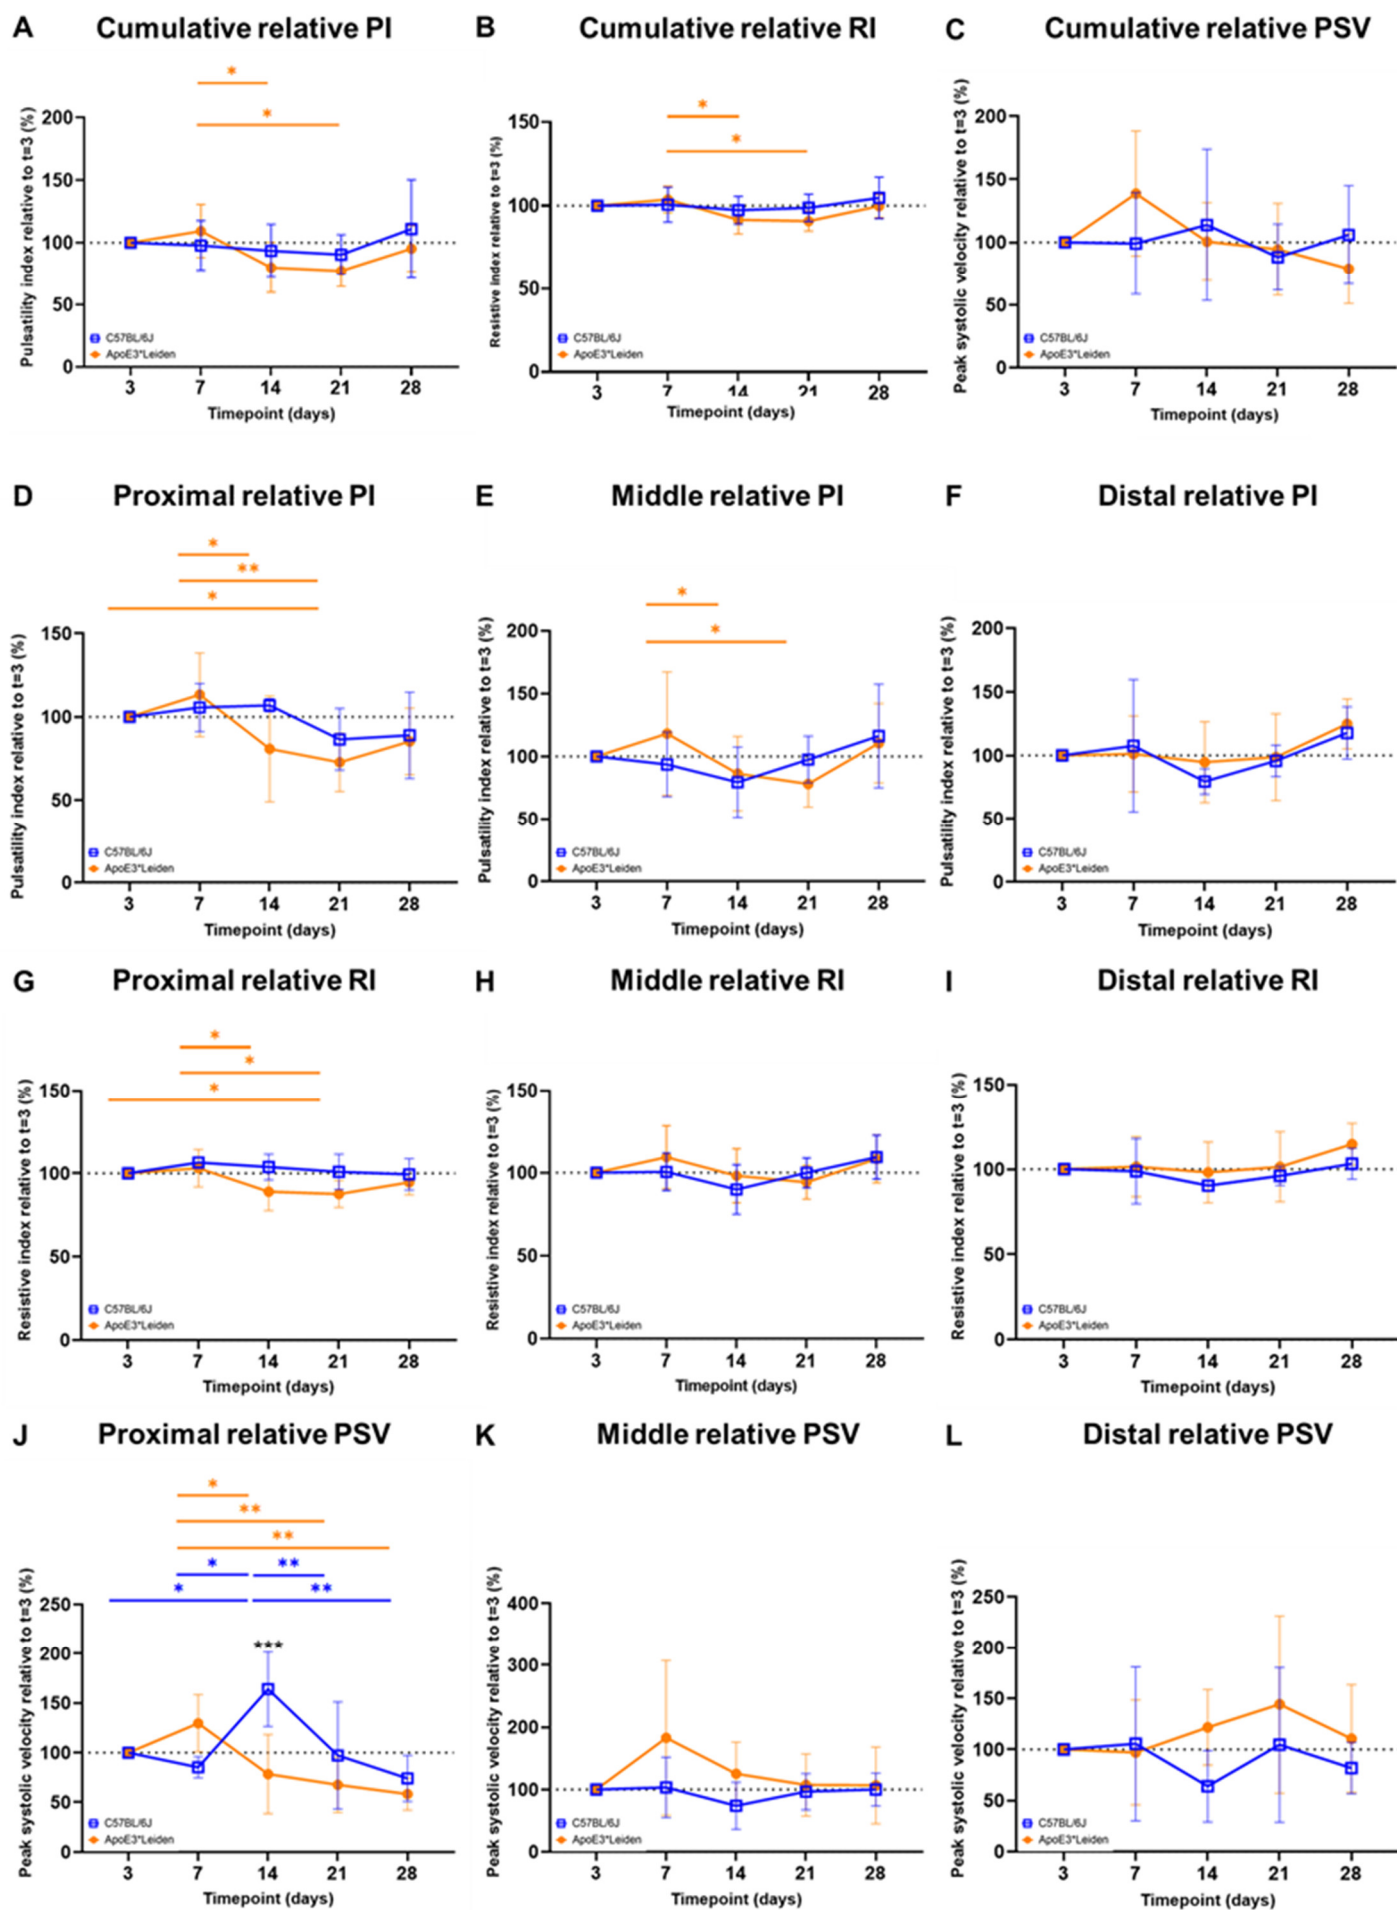

**Supplementary Figure S2 | Velocity measurements of vein grafts in C57BL/6J and ApoE3\*Leiden mice over time, as split per proximal, middle, and distal location.**

(A, B, C) Cumulative values for respectively the PI, RI, and peak systolic velocity (PSV) of vein grafted C57BL/6J (n=7, chow diet) and ApoE3\*Leiden mice (n=7, high fat diet) over time. Pulsatility index (PI) (D, E, F), resistive index (RI) (G, H, I), and peak systolic velocity (PSV) (J, K, L) of vein grafts in C57BL/6J and ApoE3\*Leiden mice during 28 days after surgery. The data are shown relative to baseline t=3 days after surgery, with lumen and wall size being 100%. Statistics: ANOVA mixed model, corrected for multiple testing; \* p<0.05, \*\* p<0.01.

### A Cumulative relative flow rate

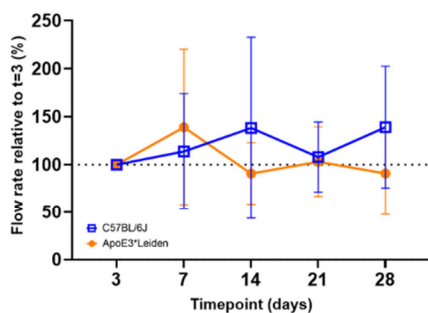

### B Proximal relative flow rate

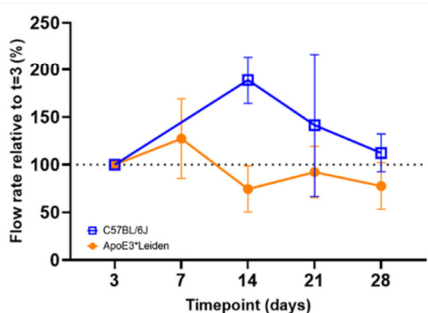

### C Middle relative flow rate

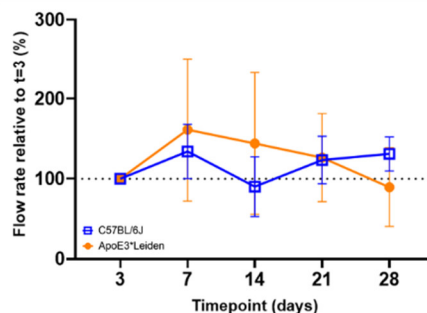

### D Distal relative flow rate

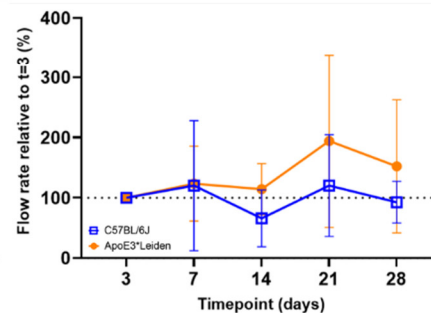

**Supplementary Figure S3 | Relative blood flow rate of vein grafts in C57BL/6J and ApoE3\*Leiden mice over time, as split per proximal, middle, and distal location.**

Cumulative (A), proximal (B), middle (C), and distal (D) relative flow rate of vein grafts in C57BL/6J and ApoE3\*Leiden mice during 28 days post-surgery. The data are shown relative to baseline  $t=3$  days after surgery, with lumen and wall size being 100%. Statistics: ANOVA mixed model, corrected for multiple testing.

**A Cumulative ACCsys**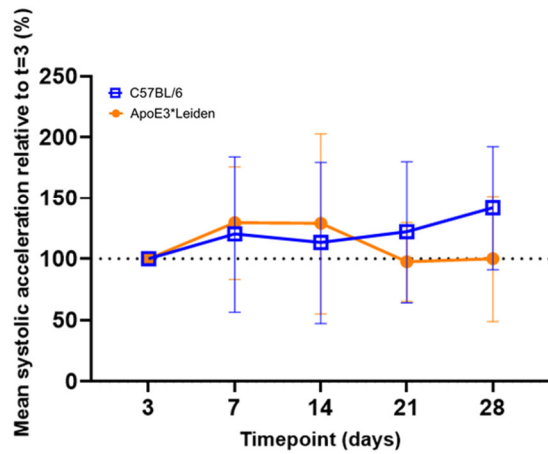**B Proximal ACCsys**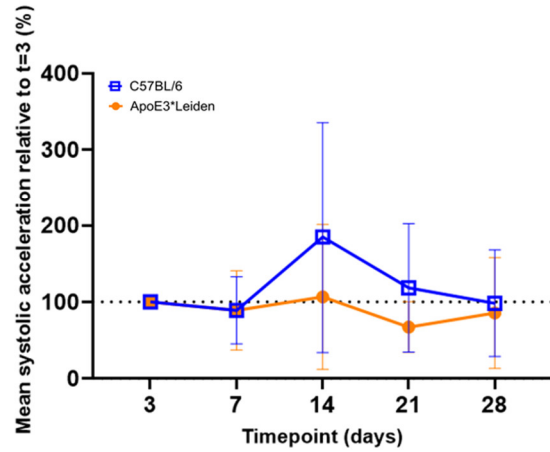**C Middle ACCsys**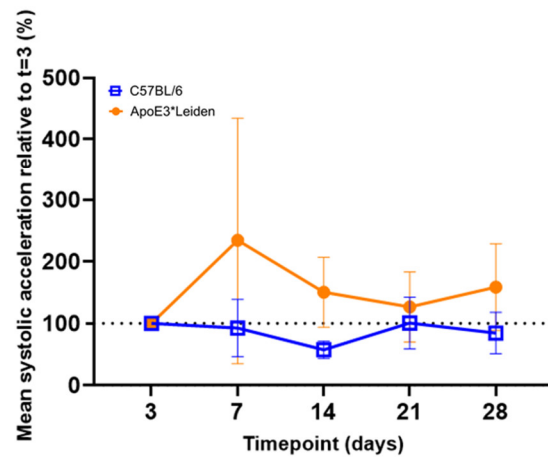**D Distal ACCsys**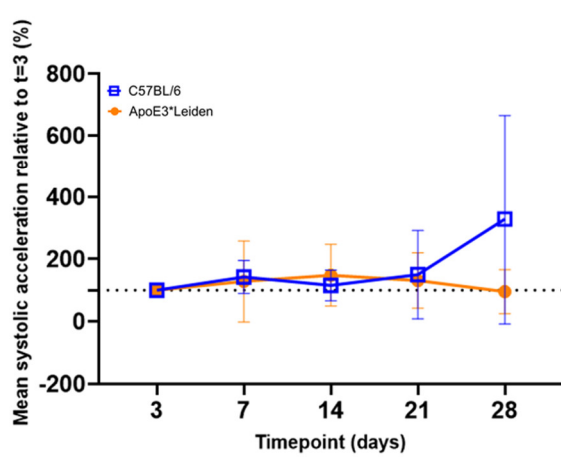

**Supplementary Figure S4 | Mean systolic acceleration (ACCsys) in vein grafts of C57BL/6J and ApoE3\*Leiden mice.**

Cumulative (A), Proximal (B), Middle (C), and Distal (D) ACCsys in vein grafts of C57BL/6J and ApoE3\*Leiden mice from 3 to 28 days post- surgery. Statistics: ANOVA mixed model, corrected for multiple testing.

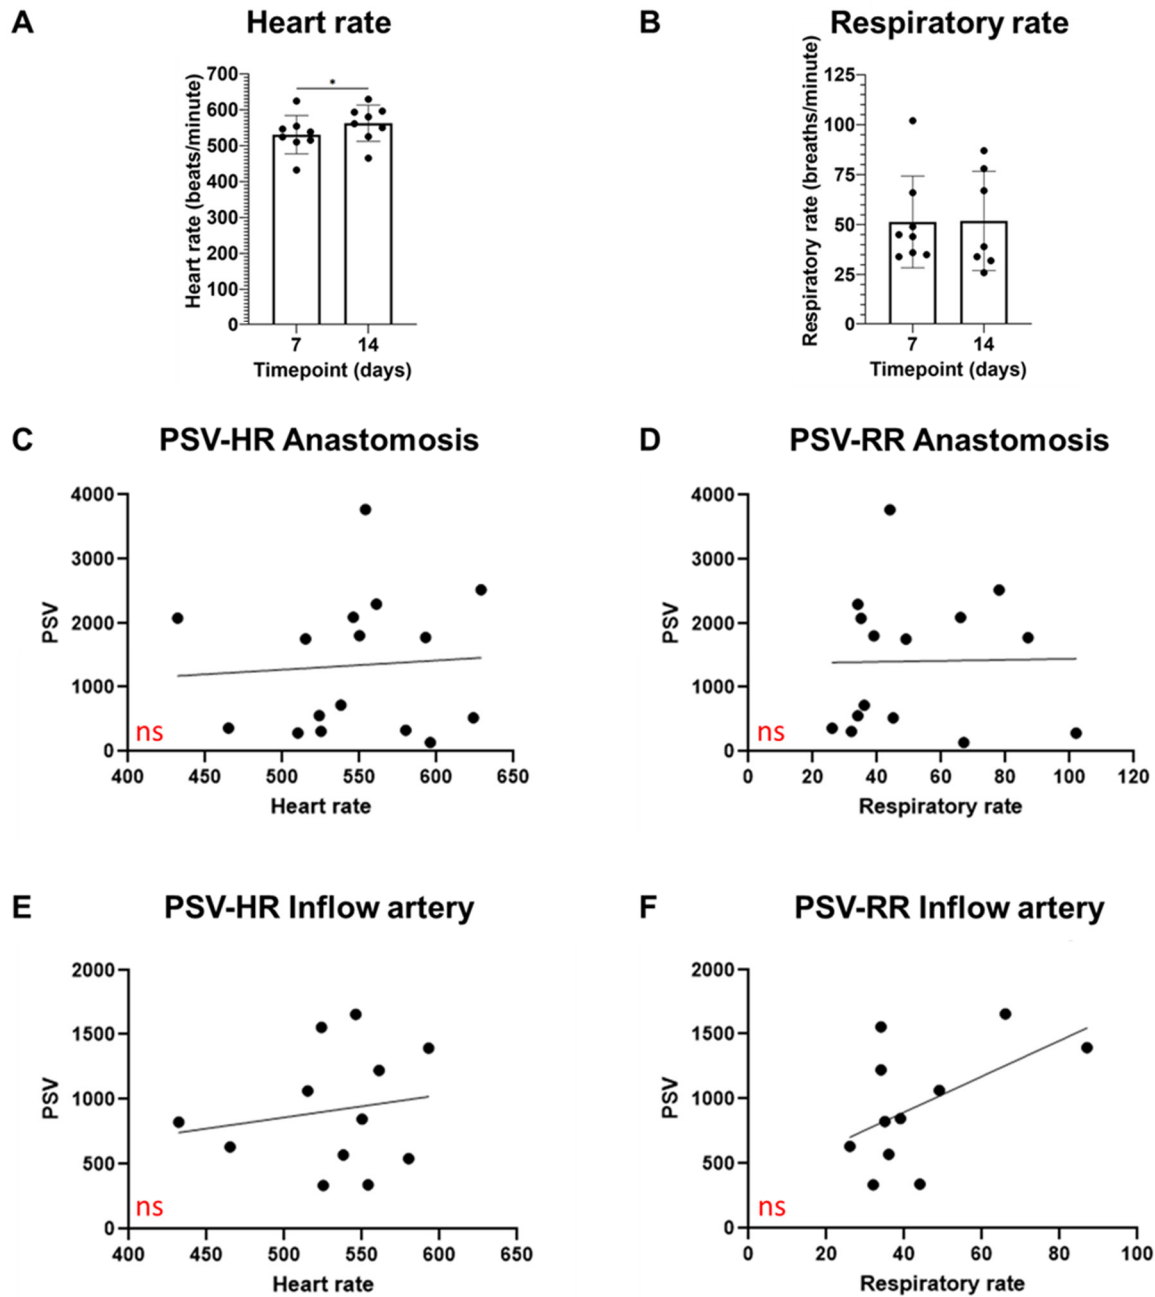

**Supplementary Figure S5 | Heart and respiratory rate measures as related to the PSV in C57BL/6J mice that underwent AVF surgery.**

Heart (A) and respiratory (B) rate of C57BL/6J mice (n=8) on time points 7 and 14 post AVF surgery. Correlation plots of the peak systolic velocity (PSV) at the anastomotic site of the AVF against the heart (C) and respiratory (D) rate (time point 7 and 14 days combined). Correlation plots of the PSV at the anastomotic site of the AVF against the heart (E) and respiratory (F) rate (time point 7 and 14 days combined). Statistics: Paired T-test and Pearson r; \*  $p < 0.05$ . ns=not significant.

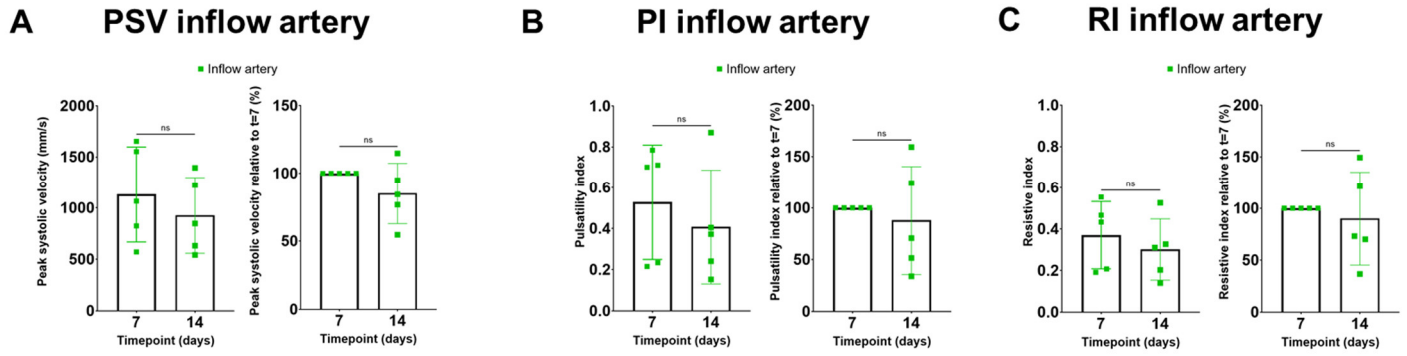

**Supplementary Figure S6 | Absolute and relative velocities of the inflow artery of C57BL/6J AVF mice over time.**

Absolute and relative peak systolic velocity (PSV) (A), pulsatility index (PI) (B), and resistive index (RI) (C) in the inflow artery of C57BL/6J AVF mice at 7 and 14 days post-surgery (n=5) in C57BL/6J mice after 7 and 14 days post-surgery. Statistics: Paired T-test. ns=not significant.

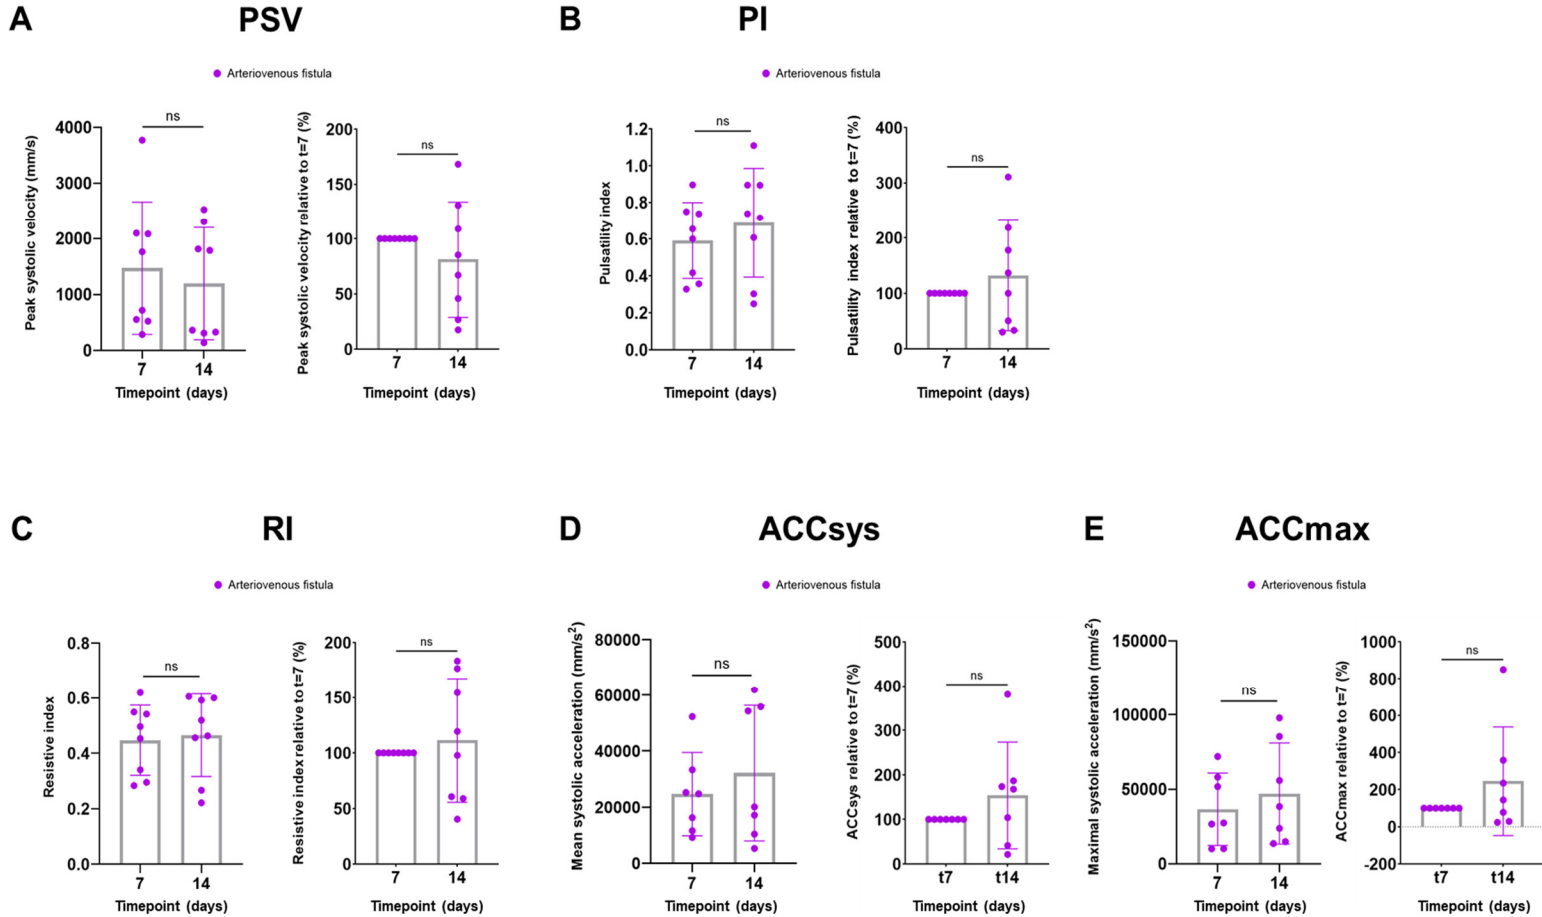

**Supplementary Figure S7 | Velocity and acceleration measurements of arteriovenous fistulas in C57BL/6J mice over time.**

Relative and absolute values of the peak systolic velocity (**A**), pulsatility index (**B**), resistive index (**C**), mean systolic acceleration (**D**), and maximal systolic acceleration (**E**) in AVFs in C57BL/6J mice after 7 and 14 days post-surgery (n=7). Paired T-test. ns=not significant.
